# Supplementary material for: Effectiveness and safety of tocilizumab in patients with systemic sclerosis: a propensity score matched controlled observational study of the EUSTAR cohort
Source: PubMed Central journal article supplement — RMD Open. 2022 Nov 3;8(2):e002477. doi: 10.1136/rmdopen-2022-002477 (PMC9639158; doi:10.1136/rmdopen-2022-002477), 2022-11-03
Supplement: rmdopen-2022-002477supp001.pdf [file rmdopen-2022-002477supp001.pdf]

## SUPPLEMENTARY APPENDIX

### Assessment of data

The following parameters were collected in the CRFs: age and gender, autoantibody profile, disease duration (defined as time since onset of first non-Raynaud symptoms), disease subtype (diffuse vs. limited disease according to Leroy). The modified Rodnan Skin Score (mRSS) was used to evaluate skin fibrosis.(1) EUSTAR investigators are regularly trained to perform the mRSS.(2-4) Pulmonary function was primarily evaluated by measurement of forced vital capacity (FVC) % predicted, diffusing capacity of the lung for carbon monoxide (DLCO) % predicted and high-resolution CT (HRCT). Moreover, safety of TCZ was assessed by various other clinical and laboratory parameters. Data were collected at baseline as well as 3-, 6- and 12-months follow-up.

### Supplementary tables

| Supplementary Table S1. Overlap syndrome with RA                                                                                                                                    |                             |
|-------------------------------------------------------------------------------------------------------------------------------------------------------------------------------------|-----------------------------|
|                                                                                                                                                                                     | TCZ treated patients (n=93) |
| Anti CCP positive                                                                                                                                                                   | 13/55 (23.6%)               |
| RF positive                                                                                                                                                                         | 22/60 (36.7%)               |
| RF and anti- CCP both positive                                                                                                                                                      | 11/60 (18.3%)               |
| Overlap syndrome RA as reported by principal investigator                                                                                                                           | 20/72 (27.8%)               |
| No data was available for the control patients. Abbreviations: anti-CCP- anti cyclic citrullinated peptide antibody, RA-rheumatoid arthritis; RF-rheumatoid factor; TCZ-tocilizumab |                             |

| Supplementary Table S2. Pooled SMD between groups after multiple imputation and propensity score matching (nearest neighbour matching algorithm)             |                             |
|--------------------------------------------------------------------------------------------------------------------------------------------------------------|-----------------------------|
|                                                                                                                                                              | SMD mean across imputations |
| age                                                                                                                                                          | 0.077                       |
| sex                                                                                                                                                          | 0.080                       |
| Scleroderma subtype                                                                                                                                          | 0.073                       |
| Baseline mRSS                                                                                                                                                | 0.061                       |
| Baseline FVC % predicted                                                                                                                                     | 0.093                       |
| Baseline DLCO % predicted                                                                                                                                    | 0.085                       |
| Immunosuppressive co-therapy                                                                                                                                 | 0.061                       |
| Rituximab within 6 months                                                                                                                                    | 0.076                       |
| Disease duration                                                                                                                                             | 0.053                       |
| Year of treatment                                                                                                                                            | 0.063                       |
| Abbreviations: SMD- standardised mean difference; mRSS- modified Rodnan skin score; FVC- forced vital capacity; DLCO-diffusing capacity for carbon monoxide; |                             |

| Supplementary Table S3. Progressive and regressive patients                                                                                                                                                                                                                                                                                                                                                                                                                                                                          |             |                |
|--------------------------------------------------------------------------------------------------------------------------------------------------------------------------------------------------------------------------------------------------------------------------------------------------------------------------------------------------------------------------------------------------------------------------------------------------------------------------------------------------------------------------------------|-------------|----------------|
| Secondary outcome                                                                                                                                                                                                                                                                                                                                                                                                                                                                                                                    | group       | Percentage (%) |
| Progressive lung fibrosis                                                                                                                                                                                                                                                                                                                                                                                                                                                                                                            | TCZ treated | 14.1           |
| Progressive lung fibrosis                                                                                                                                                                                                                                                                                                                                                                                                                                                                                                            | control     | 17.4           |
| Progressive skin fibrosis                                                                                                                                                                                                                                                                                                                                                                                                                                                                                                            | TCZ treated | 4.0            |
| Progressive skin fibrosis                                                                                                                                                                                                                                                                                                                                                                                                                                                                                                            | control     | 3.9            |
| Regressive lung fibrosis                                                                                                                                                                                                                                                                                                                                                                                                                                                                                                             | TCZ treated | 22.3           |
| Regressive lung fibrosis                                                                                                                                                                                                                                                                                                                                                                                                                                                                                                             | control     | 16.1           |
| Regressive skin fibrosis                                                                                                                                                                                                                                                                                                                                                                                                                                                                                                             | TCZ treated | 20.1           |
| Regressive skin fibrosis                                                                                                                                                                                                                                                                                                                                                                                                                                                                                                             | control     | 18.9           |
| <p>Progression/regression of the skin fibrosis was defined as: an increase/decrease in mRSS &gt;5 units AND ≥25% from baseline to 12±3 months follow up. Progression/regression of lung fibrosis is defined as decrease from baseline to 12±3 months follow-up in FVC ≥10%, or FVC decrease 5%–9% combined with diffusing capacity for carbon monoxide (DLCO) ≥15%. After multiple imputation the <b>most.recent</b> selection of patients and the <b>nearest</b> neighbor matching was applied. Abbreviations: TCZ- tocilizumab</p> |             |                |

| <b>Supplementary Table S4. Baseline demographics of random drawn dataset after multiple imputation and propensity score matching</b>                                                                                                                                                                                                             |                  |                  |          |        |
|--------------------------------------------------------------------------------------------------------------------------------------------------------------------------------------------------------------------------------------------------------------------------------------------------------------------------------------------------|------------------|------------------|----------|--------|
|                                                                                                                                                                                                                                                                                                                                                  | Tocilizumab      | Control group    | p-values | SMD    |
|                                                                                                                                                                                                                                                                                                                                                  | N=93             | N=93             |          |        |
| Age (mean±SD; years)                                                                                                                                                                                                                                                                                                                             | 50.9±13.5        | 48.4±15.1        | 0.23     | 0.18   |
| Sex                                                                                                                                                                                                                                                                                                                                              |                  |                  |          |        |
| Female (n, %)                                                                                                                                                                                                                                                                                                                                    | 73 (78.5)        | 73 (78.5)        | 1.00     | <0.001 |
| Scleroderma subtype                                                                                                                                                                                                                                                                                                                              |                  |                  |          |        |
| Diffuse (n, %)                                                                                                                                                                                                                                                                                                                                   | 54 (58.1)        | 55 (59.1)        | 1.00     | 0.02   |
| Immunosuppressive co-therapy                                                                                                                                                                                                                                                                                                                     |                  |                  |          |        |
| Yes (n, %)                                                                                                                                                                                                                                                                                                                                       | 75 (80.6.)       | 75 (80.6)        | 1.00     | <0.001 |
| Prednisone (≥10 mg/day; n; %)                                                                                                                                                                                                                                                                                                                    | 44 (47.3)        | 16 (17.2)        | <0.001   | 0.68   |
| Cyclophosphamide (n, %)                                                                                                                                                                                                                                                                                                                          | 0                | 6 (7.2)          | NaN      | NaN    |
| Methotrexate (n, %)                                                                                                                                                                                                                                                                                                                              | 41 (44.1)        | 31 (33.3)        | 0.18     | 0.22   |
| Azathioprine (n, %)                                                                                                                                                                                                                                                                                                                              | 6 (6.5)          | 20 (21.5)        | 0.01     | 0.45   |
| Mycophenolate mofetil (n, %)                                                                                                                                                                                                                                                                                                                     | 6 (6.5)          | 18 (19.4)        | 0.02     | 0.39   |
| D-penicillamine (n, %)                                                                                                                                                                                                                                                                                                                           | 0                | 0                | NaN      | NaN    |
| Rituximab within 6 months (n, %)                                                                                                                                                                                                                                                                                                                 | 1 (1.1)          | 1 (1.1)          | 1.00     | <0.001 |
| Imatinib (n, %)                                                                                                                                                                                                                                                                                                                                  | 0                | 0                | NaN      | NaN    |
| TNF-alpha antagonist (n, %)                                                                                                                                                                                                                                                                                                                      | 0                | 0                | NaN      | NaN    |
| Abatacept (n, %)                                                                                                                                                                                                                                                                                                                                 | 1 (1.1)          | 0                | NaN      | NaN    |
| Disease duration (mean±SD; years)                                                                                                                                                                                                                                                                                                                | 6.4±5.4          | 6.2±4.9          | 0.79     | 0.04   |
| Autoantibodies positive                                                                                                                                                                                                                                                                                                                          |                  |                  |          |        |
| ANA (n, %)                                                                                                                                                                                                                                                                                                                                       | 73 (92.4)        | 78 (96.3)        | 0.47     | 0.17   |
| ACA (n, %)                                                                                                                                                                                                                                                                                                                                       | 12 (16.7)        | 10 (13.5)        | 0.76     | 0.09   |
| Anti-Scl-70 (n, %)                                                                                                                                                                                                                                                                                                                               | 54 (65.1)        | 42 (53.8)        | 0.20     | 0.23   |
| CRP ≥ 5mg/l (n, %)                                                                                                                                                                                                                                                                                                                               | 38 (43.7)        | 80 (87.9)        | <0.001   | 1.05   |
| ESR elevation (>25mm/h)                                                                                                                                                                                                                                                                                                                          | 38 (54.3)        | 29 (34.9)        | 0.03     | 0.40   |
| mRSS (median, IQR)                                                                                                                                                                                                                                                                                                                               | 13.0 (6.0, 22.0) | 11.0 (6.0, 21.0) | 0.67     | 0.07   |
| FVC % predicted (mean±SD)                                                                                                                                                                                                                                                                                                                        | 87.7±21.4        | 88.0±22.8        | 0.93     | 0.01   |
| DLCO % predicted (mean±SD)                                                                                                                                                                                                                                                                                                                       | 62.6±21.9        | 65.1±19.0        | 0.41     | 0.12   |
| HRCT positive or X-ray positive                                                                                                                                                                                                                                                                                                                  | 49 (73.1)        | 37 (47.4)        | 0.003    | 0.54   |
| Digital ulcers (n, %)                                                                                                                                                                                                                                                                                                                            | 16 (17.8)        | 12 (18.5)        | 1.00     | 0.02   |
| Joint synovitis (n, %)                                                                                                                                                                                                                                                                                                                           | 44 (62.0)        | 14 (15.4)        | <0.001   | 1.09   |
| Tendon friction rubs (n, %)                                                                                                                                                                                                                                                                                                                      | 25 (31.2)        | 11 (12.1)        | 0.004    | 0.48   |
| Demographics and clinical Characteristics are defined according to EUSTAR criteria.[5] Above shown data is before multiple imputation and propensity score matching. Abbreviations: SD-standard deviation; mRSS- modified Rodnan skin score; FVC- forced vital capacity; DLCO- diffusing capacity for carbon monoxide;NaN- not available number; |                  |                  |          |        |

| <b>Supplementary Table S5. Subgroup analysis (nearest neighbour matching and selection of most recent observation)</b> |         |                              |
|------------------------------------------------------------------------------------------------------------------------|---------|------------------------------|
|                                                                                                                        | outcome | p-value for interaction test |
| mRSS $\geq$ 10 versus mRSS <10                                                                                         | mRSS    | 0.77                         |
|                                                                                                                        | FVC     | 0.47                         |
| diffuse versus limited                                                                                                 | mRSS    | 0.81                         |
|                                                                                                                        | FVC     | 0.69                         |
| HRCT positive vs HRCT negative                                                                                         | mRSS    | 0.63                         |
|                                                                                                                        | FVC     | 0.90                         |
| FVC <80% versus FVC $\geq$ 80%                                                                                         | mRSS    | 0.68                         |
|                                                                                                                        | FVC     | 0.84                         |
| FVC <80% & HRCT positive                                                                                               | mRSS    | 0.76                         |
|                                                                                                                        | FVC     | 0.41                         |
| Disease duration (in years) $\leq$ 3 versus disease duration >3                                                        | mRSS    | 0.23                         |
|                                                                                                                        | FVC     | 0.63                         |
| C-reactive protein (CRP) $\leq$ 5 mg/l versus CRP > 5 mg/l                                                             | mRSS    | 0.95                         |
|                                                                                                                        | FVC     | 0.55                         |

Abbreviations: mRSS- modified Rodnan skin score; FVC- forced vital capacity % predicted; HRCT- high resolution computed tomography

| <b>Supplementary Table S6. mRSS at follow-up (12<math>\pm</math>3months), sensitivity analyses</b> |                        |                            |                    |                     |                    |
|----------------------------------------------------------------------------------------------------|------------------------|----------------------------|--------------------|---------------------|--------------------|
|                                                                                                    |                        | nearest neighbour matching |                    | exact matching      |                    |
|                                                                                                    |                        | most recent                | random             | most recent         | random             |
| Tocilizumab                                                                                        | mean estimate (95% CI) | 11.2 (9.1 to 13.3)         | 11.1 (9.1 to 13.2) | 11.2 (9.1 to 13.3)  | 11.1 (9.1 to 13.2) |
| Controls                                                                                           | mean estimate (95% CI) | 12.2 (9.7 to 14.6)         | 12.0 (9.6 to 14.4) | 12.5 (10.3 to 14.7) | 12.1 (9.8 to 14.4) |
| between group difference                                                                           | mean estimate (95% CI) | -1.0 (-3.7 to 1.8)         | -0.8 (-3.8 to 2.1) | -1.3 (-3.5 to 0.9)  | -1.0 (-3.4 to 1.5) |
| p-value                                                                                            |                        | 0.48                       | 0.58               | 0.25                | 0.44               |

Abbreviations: mRSS- modified Rodnan skin score; CI-confidence interval

| <b>Supplementary Table S7. FVC at follow-up (12<math>\pm</math>3months), sensitivity analyses</b> |                        |                            |                     |                     |                     |
|---------------------------------------------------------------------------------------------------|------------------------|----------------------------|---------------------|---------------------|---------------------|
|                                                                                                   |                        | nearest neighbour matching |                     | exact matching      |                     |
|                                                                                                   |                        | most recent                | random              | most recent         | random              |
| Tocilizumab                                                                                       | mean estimate (95% CI) | 88.7 (83.7 to 93.7)        | 88.7 (83.6 to 93.8) | 88.7 (83.7 to 93.7) | 88.7 (83.7 to 93.8) |
| Controls                                                                                          | mean estimate (95% CI) | 87.2 (80.8 to 93.6)        | 87.2 (80.6 to 93.9) | 87.9 (82.2 to 93.6) | 87.6 (81.2 to 93.9) |
| between group difference                                                                          | mean estimate (95% CI) | 1.5 (-6.1 to 9.07)         | 1.5 (-6.4 to 9.3)   | 0.8 (-6.1 to 7.7)   | 1.2 (-6.6 to 8.9)   |
| p-value                                                                                           |                        | 0.70                       | 0.72                | 0.82                | 0.77                |

Abbreviations: FVC- forced vital capacity % predicted; CI-confidence interval

| Supplementary Table S8. Progression and regression of mRSS, sensitivity analyses |                            |                     |                     |                     |
|----------------------------------------------------------------------------------|----------------------------|---------------------|---------------------|---------------------|
|                                                                                  | nearest neighbour matching |                     | exact matching      |                     |
|                                                                                  | most recent                | random              | most recent         | random              |
| Estimated treatment effect of TCZ for progression OR (95% CI)                    | 0.73 (0.11 to 4.83)        | 0.66 (0.10 to 4.39) | 0.83 (0.12 to 5.76) | 0.76 (0.10 to 5.51) |
| p-values                                                                         | 0.74                       | 0.66                | 0.85                | 0.78                |
| Estimated treatment effect of TCZ for regression OR (95% CI)                     | 1.09 (0.44 to 2.70)        | 1.01 (0.39 to 2.64) | 1.11 (0.39 to 3.13) | 1.10 (0.39 to 3.09) |
| p-value                                                                          | 0.86                       | 0.99                | 0.84                | 0.85                |

Abbreviations: mRSS- modified Rodnan skin score; CI-confidence interval; TCZ-tocilizumab; OR-odds ratio

| Supplementary Table S9. Progression and regression of FVC, sensitivity analyses |                            |                     |                     |                     |
|---------------------------------------------------------------------------------|----------------------------|---------------------|---------------------|---------------------|
|                                                                                 | nearest neighbour matching |                     | exact matching      |                     |
|                                                                                 | most recent                | random              | most recent         | random              |
| Estimated treatment effect of TCZ on FVC decline OR (95% CI)                    | 0.77 (0.27 to 2.24)        | 0.68 (0.24 to 1.95) | 0.80 (0.27 to 2.37) | 0.68 (0.23 to 2.00) |
| p-values                                                                        | 0.63                       | 0.48                | 0.69                | 0.48                |
| Estimated treatment effect of TCZ for on FVC improvement OR (95% CI)            | 1.49 (0.58 to 3.84)        | 1.46 (0.53 to 4.06) | 1.29 (0.52 to 3.18) | 1.35 (0.53 to 3.40) |
| p-value                                                                         | 0.41                       | 0.47                | 0.58                | 0.53                |

Abbreviations: FVC- Forced vital capacity % predicted; CI-confidence interval; TCZ-tocilizumab; OR-odds ratio

## References:

1. Clements P, Lachenbruch P, Siebold J, White B, Weiner S, Martin R, et al. Inter and intraobserver variability of total skin thickness score (modified Rodnan TSS) in systemic sclerosis. *J Rheumatol.* 1995;22(7):1281-5.
2. Czirják L, Foeldvari I, Müller-Ladner U. Skin involvement in systemic sclerosis. *Rheumatology (Oxford).* 2008;47 Suppl 5:v44-5.
3. Ionescu R, Rednic S, Damjanov N, Varjú C, Nagy Z, Minier T, et al. Repeated teaching courses of the modified Rodnan skin score in systemic sclerosis. *Clin Exp Rheumatol.* 2010;28(2 Suppl 58):S37-41.
4. Khanna D, Furst DE, Clements PJ, Allanore Y, Baron M, Czirjak L, et al. Standardization of the modified Rodnan skin score for use in clinical trials of systemic sclerosis. *J Scleroderma Relat Disord.* 2017;2(1):11-8.
5. Walker UA, Tyndall A, Czirják L, et al. Clinical risk assessment of organ manifestations in systemic sclerosis: a report from the EULAR Scleroderma Trials And Research group database. *Ann Rheum Dis.* 2007 Jun; 66(6):754-763.

## Statistical analysis plan

---

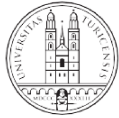

**University of  
Zurich**<sup>UZH</sup>

Epidemiology, Biostatistics  
and Prevention Institute,  
Biostatistics Department  
+41 44 634 46 41  
[www.biostat.uzh.ch](http://www.biostat.uzh.ch)

---

# Statistical Analysis Plan: Treatment effect of tocilizumab in systemic sclerosis patients estimated from the EUSTAR database with propensity-score matching.

Analysis for Dr. Suzana Jordan, Prof. Oliver Distler

PD Dr. Ulrike Held ([ulrike.held@uzh.ch](mailto:ulrike.held@uzh.ch))

BSc. Klaus Steigmiller ([klaus.steigmiller@uzh.ch](mailto:klaus.steigmiller@uzh.ch))

Version 1.5 of September 6, 2018

## Contents

|           |                                                                     |          |
|-----------|---------------------------------------------------------------------|----------|
| <b>1</b>  | <b>Introduction</b>                                                 | <b>1</b> |
| <b>2</b>  | <b>Data source</b>                                                  | <b>2</b> |
| <b>3</b>  | <b>Aims</b>                                                         | <b>2</b> |
| <b>4</b>  | <b>Analysis sets and populations</b>                                | <b>2</b> |
| <b>5</b>  | <b>Endpoints, covariates, and subgroups</b>                         | <b>3</b> |
| <b>6</b>  | <b>Handling of missing values and other data conventions</b>        | <b>4</b> |
| <b>7</b>  | <b>Statistical methodology</b>                                      | <b>4</b> |
| <b>8</b>  | <b>Sensitivity analysis</b>                                         | <b>5</b> |
| <b>9</b>  | <b>Rationale for any deviation from pre-specified analysis plan</b> | <b>5</b> |
| <b>10</b> | <b>References</b>                                                   | <b>5</b> |

## 1 Introduction

Systemic sclerosis (SSc) is a rare autoimmune disease, associated with a high risk of mortality (Elhai et al., 2012). Although treatments have become available for some manifestations such as pulmonary arterial hypertension, until now, there is no effective therapy to counteract the fibrotic process of this

disease. Increasing evidence supports a contribution of the immune system and in particular interleukin 6 (IL-6) in the pathogenesis of SSc (O'Reilly et al., 2013). In SSc-patients

Epidemiology, Biostatistics and Prevention Institute, Biostatistics Department University of Zurich preliminary data have suggested that tocilizumab, a humanised anti-IL-6 receptor antibody, might improve dermal fibrosis and joint involvement in refractory polyarthritis associated with SSc (Shima et al., 2010) (Elhai et al., 2013). Following these results, a phase II randomized controlled trial was performed enrolling 87 diffuse cutaneous SSc with progressive skin disease (Khanna et al., 2016). The primary endpoint (difference in mean change from baseline in modified Rodnan skin score at 24 weeks) was not met, but Rodnan skin score had a greater decreasing trend in patients treated with Tocilizumab than in those receiving placebo ( $p=0.06$ ). Furthermore, one exploratory analysis revealed that fewer patients in the Tocilizumab group had a decline in forced vital capacity at 48 weeks ( $p=0.04$ ). An ongoing phase III trial might help to better analyse safety and efficacy of tocilizumab in SSc. However, limited follow-up periods and strict criteria for recruitment in clinical trials prevent from documenting effects in a broader population and the long-term outcomes of the patients and might lead to an underestimation of adverse events. Therefore, data from large "real-life" registries could be used to better determine the effects of Tocilizumab on different involvements of SSc, to identify who, among SSc-patients might benefit from this treatment, and to analyse long-term efficacy and safety of tocilizumab in SSc.

## 2 Data source

We will use data from the EUSTAR ("European Scleroderma Treatment And Research") database. There are currently more than 200 scleroderma centres in the EUSTAR cohort, treating more than 15,000 patients with SSc. To document the course and treatment of scleroderma, the EUSTAR cohort maintains an online patient database. The data is stored centrally in Switzerland (New Win AG). Patient data were entered starting from January 2009. Further information is available on [www.EUSTAR.org](http://www.EUSTAR.org).

## 3 Aims

The aim of this project is to evaluate the outcomes of SSc-patients receiving tocilizumab in routine care in comparison with SSc-patients not receiving tocilizumab.

## 4 Analysis sets and populations

**Definition of treated and controls:** Patients reported from the EUSTAR database receiving tocilizumab for at least 3 months are considered as TREATED. Patients from the database not receiving tocilizumab are considered as potential CONTROLS.

### Inclusion criteria:

- Age  $\geq$  17 years
- Observations of patients entering the database after 1.1.2010
- Classification criteria for SSc fulfilled (ACR 1980 criteria or 2013 ACR/EULAR criteria)
- Potential control patients with disease duration  $\leq$  35 years



## 5 Endpoints, covariates, and subgroups

**Primary endpoints:** Primary endpoints are mRSS (modified Rodnan Skin Score) and FVC, both at 12 months follow-up time. The time window for the 12 months assessment will be a 9-15 months window. The two different endpoints will be addressed separately, but a single matched set of patient treated-control pairs will be used for analysis.

**Exploratory secondary endpoints:** The percentage of progressive patients for skin under therapy, defined as an increase in (mRSS of 5 points AND of 25% compared to baseline). The percentage of progressive patients for lung under therapy, defined as a decrease in either (FVC > 10%) or (FVC > 5% AND DLCO > 15%).

The percentage of regressive patients for skin under therapy, defined as a (decrease in mRSS of 5 points AND of 25% compared to baseline). The percentage of regressive patients for lung under therapy, defined as an increase in either (FVC > 10%) or (FVC > 5% AND DLCO > 15%).

### Covariates identified to impact outcomes are

- Age (years)
- Gender
- Subtype (limited / diffuse)
- Baseline mRSS, baseline FVC, baseline DLCO
- Co-therapy immunosuppressive DMARDs (prednisone > 10mg/d, Methotrexate, azathioprine and mycophenolate mofetil), either one (coded 1) or none (coded 0)
- Rituximab (biologic) within 6 months before baseline
- Disease duration (years)
- Year of treatment

The above defined covariates (confounders) will be used for matching.

### Pre-specified exploratory subgroup analysis for primary endpoints, and secondary endpoints where applicable:

- Subgroup analysis for baseline mRSS: mRSS  $\geq 10$  versus  $< 10$ .
- Subgroup analysis for subtype analysis: diffuse SSc vs limited SSc.
- Subgroup analysis for baseline FVC: FVC < 80% versus  $\geq 80\%$ .
- Subgroup analysis for baseline FVC: FVC < 80% and HRCT-diagnosed lung fibrosis versus complementary group.

A test for interaction will precede the subgroup analyses. Only if  $p < 0.05$ , we assume that there is evidence for differential treatment effect between subgroups, and subgroup results will be reported.

## 6 Handling of missing values and other data conventions

**Missing values** Missing values will be present in the database and the case report forms.

- Potential control patients: Missing data in each of the two outcomes (FVC and mRSS) of control patients will be excluded listwise.
- Treated patients: within patients receiving tocilizumab, none will be excluded due to missing outcomes prior to multiple imputation.
- If the percentage of missing values in a covariate is above 50%, the covariate will be excluded from the analysis. Otherwise, missingness patterns will be assessed. If it can be assumed that data are missing completely at random (MCAR) or missing at random (MAR), multiple imputation using chained equations (MICE) will be applied, leading to the analysis of > 50 completed datasets. The MI will be used for the defined covariates and outcomes, at baseline and follow-up.

**Preselection of potential control observations across the database** The follow-up time is  $\pm 12 \pm 3$  months, leaving a time window from 9 - 15 months follow-up duration. A preselection of observations in control patients will extract those observations for each control patient from the database that have exactly 2 observations within this time window. The first of these will be considered as baseline, the second as follow-up. In case that still multiple control observations exist for single patients, we will use the most recent one, but this approach will be revisited in the sensitivity analysis. Eventually, one single observation (line in dataset) for each potential CONTROL patient, and all patients considered as TREATED will be used for estimating the propensity score and matching.

## 7 Statistical methodology

**Estimation of the propensity score and matching** The propensity score will be estimated with logistic regression, including the covariates described above. We plan to use an optimal matching algorithm (Ho et al., 2011), attempting to minimize a global measure of distance between treated and controls. Attention needs to be paid to matched sets in the subgroup analysis. 1:1 matching will be performed.

Balancing of baseline covariates will be assessed with descriptive statistics, exploratory p-values, and the standardized mean difference (SMD), resulting in a Table 1 before and after matching. If  $SMD < 0.1$ , the covariate will be assumed balanced between matched samples, if  $SMD \geq 0.1$  the covariate will be adjusted for in a regression model.

**Analysis after matching** If all baseline covariates are balanced after matching, the treatment effect will be estimated as mean difference between treatment groups, including 95% confidence interval for continuous outcomes and as odds ratios with 95% confidence intervals for binary outcomes. If unbalanced baseline confounders remain after matching, the analysis will be using a linear random effects model for continuous outcomes, including treatment group and potentially unbalanced covariates after matching as independent variables. Random effects will be used to account for each matched pair of TREATED-CONTROL patients. Binary outcomes will be addressed with logistic regression models under the same specifications. The results will include confirmatory p-values for primary outcomes, as well as exploratory p-values for all other hypotheses. The significance level for confirmatory p-values is set to 0.05.

## 8 Sensitivity analysis

Preselection of observations in control patients, not the most recent observation per each patient will be used, but randomly an observation will be chosen.

Exact matching for the variables Gender, Subtype, Co-therapy immunosuppressive DMARDs and Rituximab (biologic) within 6 months before baseline will be applied as sensitivity analysis.

A common critique of the matching approach is that unmeasured baseline covariates may still affect the estimated treatment effect and cannot be accounted for. Robustness of the results, in case of unmeasured confounders, will be addressed with Rosenbaum bounds for p-values and Hodges-Lehmann point estimates (Rosenbaum, 1993) (Rosenbaum, 2013). The results will be presented in combination with the calculated level of robustness, if the significance level of the first analysis was met.

## 9 Rationale for any deviation from pre-specified analysis plan

- Percentage of missing values too large for some of the defined confounders.
- Missing values in the outcomes.
- Missingness generating mechanism not at random.

## 10 References

- Elhai, M., Meune, C., Avouac, J., Kahan, A. and Allanore, Y. (2012). Trends in mortality in patients with systemic sclerosis over 40 years: a systematic review and meta-analysis of cohort studies. *Rheumatology* **51** 1017–1026.  
URL <http://dx.doi.org/10.1093/rheumatology/ker269>
- Elhai, M., Meunier, M., Matucci-Cerinic, M., Maurer, B., Riemekasten, G., Leturcq, T., Pellerito, R., Von Mühlen, C. A., Vacca, A., Airo, P., Bartoli, F., Fiori, G., Bokarewa, M., Riccieri, V., Becker, M., Avouac, J., Müller-Ladner, U., Distler, O. and Allanore, Y. (2013). Outcomes of patients with systemic sclerosis-associated polyarthritis and myopathy treated with tocilizumab or abatacept: a eustar observational study. *Annals of the Rheumatic Diseases* **72** 1217–1220.  
URL <https://ard.bmj.com/content/72/7/1217>
- Ho, D., Imai, K., King, G. and Stuart, E. (2011). Matchit: Nonparametric preprocessing for parametric causal inference. *Journal of Statistical Software, Articles* **42** 1–28.  
URL <https://www.jstatsoft.org/v042/i08>
- Khanna, D., Denton, C. P., Jhreis, A., van Laar, J. M., Frech, T. M., Anderson, M. E., Baron, M., Chung, L., Fierlbeck, G., Lakshminarayanan, S., Allanore, Y., Pope, J. E., Riemekasten, G., Steen, V., Müller-Ladner, U., Lafyatis, R., Stifano, G., Spotswood, H., Chen-Harris, H., Dziadek, S., Morimoto, A., Sornasse, T., Siegel, J. and Furst, D. E. (2016). Safety and efficacy of subcutaneous tocilizumab in adults with systemic sclerosis (fascinate): a phase 2, randomised, controlled trial. *The Lancet* **387** 2630 – 2640.  
URL <http://www.sciencedirect.com/science/article/pii/S0140673616002324>

---

Epidemiology, Biostatistics and Prevention Institute, Biostatistics Department

University of Zurich

---

O'Reilly, S., Cant, R., Ciechomska, M. and van Laar, J. M. (2013). Interleukin-6: a new therapeutic target in systemic sclerosis? *Clinical & Translational Immunology* **2** e4.

URL <https://onlinelibrary.wiley.com/doi/abs/10.1038/cti.2013.2>

R Core Team (2017). *R: A Language and Environment for Statistical Computing*. R Foundation for Statistical Computing, Vienna, Austria.

URL <https://www.R-project.org/>

Rosenbaum, P. (2013). *Observational Studies*. Springer Series in Statistics, Springer New York.

URL <https://books.google.ch/books?id=a7whBQAAQBAJ>

Rosenbaum, P. R. (1993). Hodges-lehmann point estimates of treatment effect in observational studies. *Journal of the American Statistical Association* **88** 1250–1253.

URL <https://amstat.tandfonline.com/doi/abs/10.1080/01621459.1993.10476405>

Shima, Y., Kuwahara, Y., Murota, H., Kitaba, S., Kawai, M., Hirano, T., Arimitsu, J., Narazaki, M., Hagihara, K., Ogata, A., Katayama, I., Kawase, I., Kishimoto, T. and Tanaka, T. (2010). The skin of patients with systemic sclerosis softened during the treatment with anti-il-6 receptor antibody tocilizumab. *Rheumatology* **49** 2408–2412.

URL <http://dx.doi.org/10.1093/rheumatology/keq275>
